# Supplementary material
Source: PubMed Central journal article supplement (PMC5845739)
Supplement: mic-163-1890-s001.pdf [file mic-163-1890-s001.pdf]

## Supplementary Material

**Table S1. Bacterial strains containing homologs of *R. etli* CE3 WreQ, WreU and WreV.**

WreQ (YP\_470339.1), WreU (YP\_471772.1), WreV (YP\_471773.1) were used individually as the query sequences in BLAST searches against the non-redundant protein sequence (nr) database using the blastp algorithm. In the first WreQ and WreU BLAST searches, Rhizobiaceae were excluded (to eliminate the very high number of *Rhizobium* and closely affiliated rhizobial strains) and the max target sequences were 1000 and 5000 respectively. All saved strains from that search had WreU homologs with E-values of less than  $1e^{-30}$ ; the WreQ homologs of these strains had E-values less than  $1e^{-89}$ . In the WreV BLAST search, initially the strategy was the same as with WreQ, and all the resulting sequences had an E-value of 0.0. However, the majority of sequences belonged to Pseudomonadaceae. Thus, a separate blast was performed to exclude Pseudomonadaceae as well, and with 5000 max target sequences, resulting in E-values less than  $2e^{-127}$ . Finally a search of only “Alpha-Proteobacteriaceae” was conducted and species, rather than strains, with homologs to all three genes were saved. In this final table, strains containing the three gene homologs are listed, with the accession numbers of the protein homologs. The E-values are less than  $1e^{-50}$ ,  $1e^{-30}$ , and  $4e^{-70}$  for matches with WreQ, WreU, and WreV, respectively. Where a strain number is not provided, it can be found through the gene accession numbers. The Phylo column indicates the phylogenetic affiliation of the strain within the domain Bacteria: FCB refers to the super-phylum FCB within the Bacteria; Alpha, Beta, Gamma, Delta, and Zeta refer to the sub-phyla within the Proteobacteria.

| Strain                                 | WreQ accession | WreU accession | WreV accession | Phylo |
|----------------------------------------|----------------|----------------|----------------|-------|
| <i>Chlorobium phaeobacteroides</i>     | WP_015961134.1 | WP_041467797.1 | WP_015961150.1 | FCB   |
| <i>Pelodictyon phaeoclathratiforme</i> | WP_012507375.1 | WP_012507376.1 | WP_012507339.1 | FCB   |
| <i>Agrobacterium rhizogenes</i>        | WP_034519680.1 | WP_034519733.1 | WP_034514206.1 | Alpha |
| <i>Aureimonas altamirensis</i>         | WP_060606375.1 | WP_060601527.1 | WP_039195620.1 | Alpha |
| <i>Aureimonas frigidaquae</i>          | WP_062227553.1 | WP_062227554.1 | WP_062227987.1 | Alpha |
| <i>Azospirillum brasilense</i>         | WP_035680550.1 | WP_014198799.1 | WP_014240519.1 | Alpha |
| <i>Bradyrhizobium</i>                  | WP_027564699.1 | WP_028141810.1 | WP_027564879.1 | Alpha |
| <i>Bradyrhizobium canariense</i>       | WP_085348811.1 | WP_085384688.1 | WP_085394538.1 | Alpha |
| <i>Bradyrhizobium erythrophlei</i>     | WP_079604300.1 | WP_074274213.1 | WP_092115479.1 | Alpha |
| <i>Candidatus Pelagibacter ubique</i>  | WP_029454191.1 | WP_075521062.1 | WP_029454193.1 | Alpha |
| <i>Mesorhizobium alhagi</i>            | WP_085984070.1 | WP_008835798.1 | WP_008835795.1 | Alpha |
| <i>Methylobacterium extorquens</i>     | WP_076643959.1 | WP_015822390.1 | WP_076643956.1 | Alpha |
| <i>Pseudoceanicola nitratireducens</i> | WP_093454891.1 | WP_093454896.1 | WP_093447298.1 | Alpha |
| <i>Rhizobiales bacterium 63-7</i>      | OJU66100.1     | OJU71699.1     | OJU71698.1     | Alpha |
| <i>Rhizobium acidisoli</i>             | WP_054182687.1 | WP_054185004.1 | WP_054185003.1 | Alpha |
| <i>Rhizobium aegyptiacum</i>           | WP_064694690.1 | WP_064696812.1 | WP_064696703.1 | Alpha |
| <i>Rhizobium aethiopicum</i>           | WP_092748744.1 | SCB62257.1     | SCB58533.1     | Alpha |
| <i>Rhizobium alamii</i>                | WP_037099615.1 | WP_051942476.1 | WP_051942478.1 | Alpha |
| <i>Rhizobium bangladeshense</i>        | WP_064705588.1 | WP_064712006.1 | WP_064710004.1 | Alpha |
| <i>Rhizobium etli</i>                  | WP_011426089.1 | WP_011427467.1 | WP_011427468.1 | Alpha |
| <i>Rhizobium favelukesii</i>           | WP_024317389.1 | WP_024314414.1 | WP_024317388.1 | Alpha |

|                                                        |                |                |                |       |
|--------------------------------------------------------|----------------|----------------|----------------|-------|
| Rhizobium freirei                                      | WP_004127129.1 | WP_037155461.1 | WP_004126244.1 | Alpha |
| Rhizobium gallicum                                     | WP_018446548.1 | WP_026230627.1 | WP_083636055.1 | Alpha |
| Rhizobium hainanense                                   | WP_075853437.1 | SCB21882.1     | WP_075856697.1 | Alpha |
| Rhizobium laguerreae                                   | WP_077978790.1 | WP_077979743.1 | WP_077979742.1 | Alpha |
| Rhizobium leguminosarum                                | WP_037140272.1 | WP_027687178.1 | WP_027687179.1 | Alpha |
| Rhizobium marinum                                      | WP_029621142.1 | WP_029618564.1 | WP_081852123.1 | Alpha |
| Rhizobium mesoamericanum                               | WP_040678303.1 | WP_007537568.1 | WP_028745825.1 | Alpha |
| Rhizobium miluonense                                   | WP_092851701.1 | SCB34436.1     | WP_092843462.1 | Alpha |
| Rhizobium multihospitium                               | WP_092720446.1 | WP_092720448.1 | WP_092714704.1 | Alpha |
| Rhizobium phaseoli                                     | WP_064818631.1 | WP_085744233.1 | WP_064837511.1 | Alpha |
| Rhizobium tibeticum                                    | WP_072375736.1 | WP_072373828.1 | WP_072375735.1 | Alpha |
| Rhizobium tropici                                      | WP_015341683.1 | WP_015341684.1 | WP_015338445.1 | Alpha |
| Rhizobium/Agrobacterium group                          | WP_007694703.1 | WP_007694702.1 | WP_047524929.1 | Alpha |
| Rhodopseudomonas palustris                             | WP_041798076.1 | WP_080506310.1 | WP_080674905.1 | Alpha |
| Sphingopyxis macrogoltabida                            | WP_054589353.1 | WP_054590413.1 | WP_082396031.1 | Alpha |
| Acidovorax soli                                        | SEA14343.1     | SEA14367.1     | SEA14422.1     | Beta  |
| Acidovorax wautersii                                   | WP_092939072.1 | WP_092939071.1 | WP_092939238.1 | Beta  |
| Burkholderia sp. 9120                                  | WP_035552665.1 | WP_035552664.1 | WP_035552662.1 | Beta  |
| Burkholderiales bacterium<br>RIFCSPLOWO2_12_FULL_61_40 | OGB28531.1     | OGB28530.1     | OGB28529.1     | Beta  |
| Candidatus Accumulibacter sp. 66-26                    | OJW49362.1     | OJW49363.1     | OJW49596.1     | Beta  |
| Candidatus Methylopumilus turicensis                   | WP_082048396.1 | WP_045751174.1 | WP_045751173.1 | Beta  |
| Comamonadaceae bacterium<br>CG1_02_60_18               | OIN91272.1     | OIN91271.1     | OIN91269.1     | Beta  |
| Comamonadaceae bacterium<br>CG2_30_57_122              | OIP13220.1     | OIP13227.1     | OIP13228.1     | Beta  |
| Cupriavidus sp. WS                                     | WP_081651598.1 | WP_029044350.1 | WP_043367598.1 | Beta  |
| Deefgea rivuli                                         | WP_027469006.1 | WP_027469005.1 | WP_027469004.1 | Beta  |
| Herbaspirillum aquaticum                               | WP_088756155.1 | WP_088753704.1 | WP_088756171.1 | Beta  |
| Herbaspirillum frisingense                             | WP_039875505.1 | WP_079216977.1 | WP_079216979.1 | Beta  |
| Herbaspirillum rubrisubalbicans                        | WP_058894123.1 | WP_058894118.1 | WP_082686138.1 | Beta  |
| Herbaspirillum seropedicae                             | WP_069375417.1 | WP_069375029.1 | WP_069375030.1 | Beta  |
| Herbaspirillum sp. B39                                 | WP_034337931.1 | WP_034330935.1 | WP_034330937.1 | Beta  |
| Herbaspirillum sp. HZ10                                | WP_088752243.1 | WP_088752242.1 | WP_088752241.1 | Beta  |
| Herbaspirillum sp. RV1423                              | WP_034299669.1 | WP_081768878.1 | WP_081768877.1 | Beta  |
| Herbaspirillum sp. WT00C                               | WP_075259658.1 | WP_075255625.1 | WP_075255626.1 | Beta  |
| Herbaspirillum sp. YR522                               | WP_008117337.1 | WP_008113559.1 | WP_008117346.1 | Beta  |
| Herminiimonas arsenicoxydans                           | WP_011870663.1 | WP_011870664.1 | WP_011870665.1 | Beta  |
| Herminiimonas arsenitoxidans                           | WP_076593873.1 | WP_076590916.1 | WP_076590917.1 | Beta  |

|                                                   |                |                |                |      |
|---------------------------------------------------|----------------|----------------|----------------|------|
| Hydrogenophaga palleronii                         | WP_066269231.1 | WP_066269232.1 | WP_066269233.1 | Beta |
| Hydrogenophaga sp. IBVHS1                         | WP_086126805.1 | WP_086126802.1 | WP_086126799.1 | Beta |
| Hydrogenophaga sp. PML113                         | WP_083293270.1 | WP_070400211.1 | WP_070400209.1 | Beta |
| Hydrogenophaga sp. RAC07                          | WP_083240110.1 | WP_069049138.1 | WP_069048529.1 | Beta |
| Hydrogenophaga sp. Root209                        | WP_082585539.1 | WP_056267373.1 | WP_056267049.1 | Beta |
| Hydrogenophaga sp. SCN 70-13                      | ODT34034.1     | ODT34033.1     | ODT34031.1     | Beta |
| Janthinobacterium                                 | WP_086138461.1 | WP_086138462.1 | WP_086138463.1 | Beta |
| Janthinobacterium agaricidamnosum                 | WP_038489190.1 | WP_038498699.1 | WP_038489192.1 | Beta |
| Janthinobacterium lividum                         | WP_070254296.1 | WP_070254295.1 | WP_070254294.1 | Beta |
| Janthinobacterium sp. Ant5-2-1                    | WP_058049808.1 | WP_058049809.1 | WP_058049810.1 | Beta |
| Janthinobacterium sp. GW458P                      | WP_086143996.1 | WP_086143912.1 | WP_086143913.1 | Beta |
| Janthinobacterium sp. KBS0711                     | WP_046686130.1 | WP_046686131.1 | WP_046686132.1 | Beta |
| Janthinobacterium sp. Marseille                   | WP_012080109.1 | ABR88537.1     | WP_012080107.1 | Beta |
| Janthinobacterium sp. S3-2                        | WP_065307061.1 | WP_065307060.1 | WP_065307077.1 | Beta |
| Janthinobacterium sp. TND4EL3                     | WP_076565808.1 | WP_076565810.1 | WP_076565792.1 | Beta |
| Laribacter hongkongensis                          | WP_027824056.1 | WP_027824055.1 | WP_027824054.1 | Beta |
| Laribacter hongkongensis                          | WP_088861422.1 | WP_088861421.1 | WP_088861420.1 | Beta |
| Limnohabitans planktonicus                        | WP_053170360.1 | WP_053170358.1 | WP_053171553.1 | Beta |
| Methylothermobacter mobilis                       | WP_041928542.1 | WP_015831982.1 | WP_015831983.1 | Beta |
| Methylothermobacter sp. G11                       | WP_081987064.1 | WP_047549180.1 | WP_047549183.1 | Beta |
| Methylothermobacter sp. L2L1                      | WP_036303317.1 | WP_036303315.1 | WP_036303313.1 | Beta |
| Methylothermobacter sp. RIFCSPLOWO2_02_FULL_45_14 | OGV78172.1     | OGV78179.1     | OGV77391.1     | Beta |
| Methylothermobacter versatilis                    | WP_013147951.1 | WP_041359898.1 | WP_013147953.1 | Beta |
| Methylothermobacter sp. MP688                     | WP_013440922.1 | WP_013440921.1 | WP_013442499.1 | Beta |
| Noviherbaspirillum autotrophicum                  | WP_040038466.1 | WP_040038467.1 | WP_040038468.1 | Beta |
| Noviherbaspirillum massiliense                    | WP_019141885.1 | WP_026075971.1 | WP_019141883.1 | Beta |
| Pandoraea pnomenus                                | WP_023598438.1 | WP_023598439.1 | WP_052167323.1 | Beta |
| Pandoraea vervacti                                | WP_044458602.1 | WP_044457406.1 | WP_044458601.1 | Beta |
| Paraburkholderia phenazinum                       | WP_090690488.1 | WP_090690491.1 | WP_090690498.1 | Beta |
| Paraburkholderia sartisoli                        | WP_090532012.1 | WP_090532010.1 | WP_090532007.1 | Beta |
| Paraburkholderia terrae                           | WP_086909626.1 | WP_086909596.1 | WP_086909597.1 | Beta |
| Polaromonas glacialis                             | WP_029526176.1 | WP_029526175.1 | WP_029526173.1 | Beta |
| Polaromonas jejuensis                             | WP_068831299.1 | WP_068831300.1 | WP_084389288.1 | Beta |
| Polaromonas naphthalenivorans                     | WP_011802850.1 | WP_011802849.1 | WP_011802848.1 | Beta |
| Polaromonas sp. A23                               | WP_077592725.1 | WP_077592843.1 | WP_077592727.1 | Beta |
| Polaromonas sp. C04                               | WP_077563849.1 | WP_077563851.1 | WP_077563857.1 | Beta |
| Polaromonas sp. CF318                             | WP_007862413.1 | EJL78603.1     | EJL78604.1     | Beta |
| Polaromonas sp. CG9_12                            | WP_036808892.1 | WP_036813202.1 | WP_036808899.1 | Beta |

|                                        |                |                |                |       |
|----------------------------------------|----------------|----------------|----------------|-------|
| Polaromonas sp. EUR3 1.2.1             | WP_026781163.1 | WP_026781159.1 | WP_026781158.1 | Beta  |
| Polaromonas sp. JS666                  | WP_011484870.1 | WP_011484869.1 | WP_011484867.1 | Beta  |
| Polaromonas sp. OV174                  | WP_091998443.1 | WP_091998447.1 | WP_091998450.1 | Beta  |
| Pseudorhodofera sp. Leaf265            | WP_056672590.1 | WP_056672588.1 | WP_056672598.1 | Beta  |
| Rhodofera antarcticus                  | WP_075585179.1 | WP_075585216.1 | WP_075585168.1 | Beta  |
| Rhodofera fermentans                   | WP_078364450.1 | WP_078366834.1 | WP_078364448.1 | Beta  |
| Rhodofera ferrireducens                | OQW88136.1     | OQW86158.1     | OQW88139.1     | Beta  |
| Rhodofera sp. DCY110                   | WP_076197995.1 | WP_076197993.1 | WP_076198007.1 | Beta  |
| Sulfuriferula sp. AH1                  | WP_087447710.1 | WP_087447709.1 | WP_087447732.1 | Beta  |
| Thauera humireducens                   | WP_048706753.1 | WP_048706755.1 | AMO37809.1     | Beta  |
| Thauera terpenica                      | WP_040831089.1 | WP_021250246.1 | WP_021250247.1 | Beta  |
| Variovorax paradoxus                   | WP_057595238.1 | WP_013543050.1 | WP_062361990.1 | Beta  |
| Variovorax sp. CF313                   | WP_042673666.1 | WP_007835336.1 | WP_007835345.1 | Beta  |
| Variovorax sp. JS1663                  | WP_086924577.1 | WP_086924597.1 | WP_086924576.1 | Beta  |
| delta proteobacterium MLMS-1           | WP_007292162.1 | WP_007294049.1 | WP_007294051.1 | Delta |
| Geobacter ferrihydriticus              | WP_074669617.1 | WP_040101187.1 | WP_052446538.1 | Delta |
| Geobacter bemidjensis                  | WP_012530059.1 | WP_012530060.1 | WP_012530067.1 | Delta |
| Geobacter sp. DSM 9736                 | WP_088533764.1 | WP_088536670.1 | WP_088533767.1 | Delta |
| Geobacter sp. M21                      | WP_015837859.1 | WP_015837858.1 | WP_015837853.1 | Delta |
| Geobacteraceae bacterium<br>GWB2_52_12 | OGT95934.1     | OGT95928.1     | OGT95936.1     | Delta |
| Alishewanella aestuarii                | WP_008608033.1 | WP_008608034.1 | WP_008608039.1 | Gamma |
| Alishewanella sp. HH-ZS                | WP_065956080.1 | WP_065956079.1 | WP_065956072.1 | Gamma |
| Arsukibacterium ikkense                | WP_046556227.1 | WP_046556226.1 | WP_052748930.1 | Gamma |
| Arsukibacterium sp. MJ3                | WP_046555083.1 | WP_046555081.1 | WP_052750195.1 | Gamma |
| Catenovulum maritimum                  | WP_048693212.1 | WP_048693214.1 | WP_048693216.1 | Gamma |
| Chania multitudinisentens              | WP_024911805.1 | WP_024911804.1 | WP_024911803.1 | Gamma |
| Colwellia psychrerythraea              | WP_033083676.1 | WP_033093120.1 | WP_033093119.1 | Gamma |
| Colwellia sp. TT2012                   | WP_057830224.1 | WP_057832342.1 | WP_057830226.1 | Gamma |
| Crenothrix polyspora                   | WP_087147254.1 | WP_087147253.1 | WP_087147252.1 | Gamma |
| Cycloclasticus sp. DSM 27168           | WP_073023169.1 | WP_073023168.1 | WP_073023165.1 | Gamma |
| Endozoicomonas atrinae                 | WP_066015304.1 | WP_066015305.1 | WP_066015306.1 | Gamma |
| Halomonas pantelleriensis              | WP_089656468.1 | WP_089656469.1 | WP_089656471.1 | Gamma |
| Halomonas salina                       | WP_040186301.1 | WP_081945756.1 | WP_040186321.1 | Gamma |
| Lonsdalea quercina                     | WP_094107939.1 | WP_094107961.1 | WP_094107940.1 | Gamma |
| Marinobacter hydrocarbonoclasticus     | WP_011786059.1 | WP_011786058.1 | WP_011786057.1 | Gamma |
| Marinobacter lipolyticus               | WP_018405035.1 | WP_018405034.1 | WP_018405033.1 | Gamma |
| Marinobacter salinus                   | WP_070965578.1 | WP_070973522.1 | WP_070965581.1 | Gamma |
| Marinobacterium lutimaris              | SEG57113.1     | SEG57098.1     | SEG57078.1     | Gamma |

|                                 |                |                |                |       |
|---------------------------------|----------------|----------------|----------------|-------|
| Methyloglobulus morosus         | WP_023495340.1 | WP_023495341.1 | WP_023495342.1 | Gamma |
| Methylophaga sp. 41_12_T18      | OUR72752.1     | OUR72751.1     | OUR72772.1     | Gamma |
| Nitrincola nitratireducens      | WP_036513279.1 | EXJ09743.1     | EXJ09744.1     | Gamma |
| Oceanimonas sp. GK1             | WP_041543213.1 | WP_014293024.1 | WP_014293023.1 | Gamma |
| Oleiphilus                      | WP_068474530.1 | WP_068553922.1 | WP_068474520.1 | Gamma |
| Photobacterium ganghwense       | WP_047883801.1 | WP_047883800.1 | WP_047883802.1 | Gamma |
| Photobacterium iliopiscarium    | WP_045038329.1 | WP_045038330.1 | WP_045038331.1 | Gamma |
| Photobacterium kishitanii       | WP_065173147.1 | WP_065173146.1 | WP_065173145.1 | Gamma |
| Photobacterium leiognathi       | WP_023931563.1 | WP_023931565.1 | WP_045063689.1 | Gamma |
| Photobacterium marinum          | WP_007466443.1 | WP_007466442.1 | WP_036800127.1 | Gamma |
| Photobacterium sp. SKA34        | WP_006646475.1 | WP_006646476.1 | WP_039860628.1 | Gamma |
| Photorhabdus asymbiotica        | WP_065821825.1 | WP_065821916.1 | WP_065821915.1 | Gamma |
| Photorhabdus asymbiotica        | WP_036770100.1 | WP_036770139.1 | WP_036770093.1 | Gamma |
| Pseudoalteromonas               | WP_024589810.1 | WP_024589809.1 | WP_024589808.1 | Gamma |
| Pseudoalteromonas lipolytica    | WP_074989256.1 | WP_074989257.1 | WP_074989258.1 | Gamma |
| Pseudoalteromonas luteoviolacea | WP_063378454.1 | WP_063378455.1 | WP_063378456.1 | Gamma |
| Pseudoalteromonas luteoviolacea | WP_039608254.1 | WP_039608255.1 | WP_039608256.1 | Gamma |
| Pseudoalteromonas rubra         | WP_049864426.1 | WP_046007017.1 | WP_049864427.1 | Gamma |
| Pseudoalteromonas sp. BMB       | WP_069020842.1 | WP_069020844.1 | WP_069020848.1 | Gamma |
| Pseudoalteromonas sp. BSi20429  | WP_007584995.1 | WP_007584994.1 | WP_033026984.1 | Gamma |
| Pseudomonas aeruginosa          | WP_023130787.1 | WP_023120375.1 | WP_023130786.1 | Gamma |
| Pseudomonas alcaliphila         | WP_075747014.1 | WP_064494598.1 | WP_064494599.1 | Gamma |
| Pseudomonas antarctica          | WP_064451500.1 | WP_064451502.1 | WP_083359481.1 | Gamma |
| Pseudomonas brassicacearum      | ALQ02335.1     | WP_025212585.1 | WP_081352378.1 | Gamma |
| Pseudomonas chengduensis        | WP_090336757.1 | WP_090336759.1 | WP_090336760.1 | Gamma |
| Pseudomonas chlororaphis        | WP_053269669.1 | WP_053280338.1 | WP_053280337.1 | Gamma |
| Pseudomonas composti            | WP_074940188.1 | WP_074940192.1 | WP_074940422.1 | Gamma |
| Pseudomonas fluorescens         | WP_034155277.1 | WP_034126702.1 | WP_034126705.1 | Gamma |
| Pseudomonas fluorescens         | WP_003183858.1 | WP_003189797.1 | WP_003189805.1 | Gamma |
| Pseudomonas frederiksbergensis  | WP_076031558.1 | WP_071554248.1 | WP_071554254.1 | Gamma |
| Pseudomonas oleovorans          | WP_037054107.1 | WP_037054105.1 | WP_037054102.1 | Gamma |
| Pseudomonas psychrotolerans     | WP_058761729.1 | WP_058760362.1 | WP_058761296.1 | Gamma |
| Pseudomonas putida              | WP_069942133.1 | WP_069942135.1 | WP_069942131.1 | Gamma |
| Pseudomonas sp. 1-7             | KFJ93089.1     | KFJ93088.1     | KFJ93087.1     | Gamma |
| Pseudomonas sp. C5pp            | WP_039615100.1 | WP_039615098.1 | WP_039615101.1 | Gamma |
| Pseudomonas sp. GM48            | WP_007988308.1 | WP_007985416.1 | WP_007985421.1 | Gamma |
| Pseudomonas sp. M30-35          | WP_087516444.1 | WP_087516445.1 | WP_087516446.1 | Gamma |
| Pseudomonas sp. MT-1            | WP_045428458.1 | WP_045428457.1 | WP_045428456.1 | Gamma |

|                                      |                |                |                |       |
|--------------------------------------|----------------|----------------|----------------|-------|
| <i>Pseudomonas</i> sp. NFACC19-2     | WP_072424717.1 | WP_072424718.1 | WP_072424719.1 | Gamma |
| <i>Pseudomonas stutzeri</i>          | WP_063540504.1 | WP_063540515.1 | WP_063540503.1 | Gamma |
| <i>Pseudomonas synxantha</i>         | WP_057022239.1 | WP_057022149.1 | WP_057022240.1 | Gamma |
| <i>Pseudomonas toyotomiensis</i>     | WP_074914515.1 | WP_059391714.1 | WP_059391715.1 | Gamma |
| <i>Pseudomonas veronii</i>           | WP_046483495.1 | WP_046384274.1 | WP_046384261.1 | Gamma |
| <i>Psychromonas aquimarina</i>       | WP_028862360.1 | WP_028862361.1 | WP_028862362.1 | Gamma |
| <i>Psychromonas ossibalaenae</i>     | WP_019615916.1 | WP_019615917.1 | WP_019615919.1 | Gamma |
| <i>Rheinheimera perlucida</i>        | WP_019674728.1 | WP_019674726.1 | WP_019674701.1 | Gamma |
| <i>Sedimenticola thiotaurini</i>     | WP_046859767.1 | WP_046859766.1 | WP_046859765.1 | Gamma |
| <i>Shewanella algae</i>              | WP_071237806.1 | WP_071477444.1 | WP_071237804.1 | Gamma |
| <i>Thioalkalivibrio</i> sp. AKL10    | WP_026340938.1 | WP_081624528.1 | WP_026340942.1 | Gamma |
| <i>Thioalkalivibrio</i> sp. AKL12    | WP_018951797.1 | WP_018951790.1 | WP_026289538.1 | Gamma |
| <i>Thioalkalivibrio</i> sp. AKL6     | WP_018145916.1 | WP_026182128.1 | WP_018145952.1 | Gamma |
| <i>Thioalkalivibrio</i> sp. AKL7     | WP_081624430.1 | WP_019611620.1 | WP_019612086.1 | Gamma |
| <i>Thioalkalivibrio</i> sp. AKL8     | WP_026304840.1 | WP_081623074.1 | WP_026304844.1 | Gamma |
| <i>Thioalkalivibrio</i> sp. ALJ16    | WP_018873978.1 | WP_026280011.1 | WP_018872892.1 | Gamma |
| <i>Thioalkalivibrio</i> sp. ALM2T    | WP_026333161.1 | WP_026333164.1 | WP_026333157.1 | Gamma |
| <i>Thioalkalivibrio</i> sp. ALMg13-2 | WP_019568703.1 | WP_081620896.1 | WP_026331226.1 | Gamma |
| <i>Thioalkalivibrio</i> sp. ALMg2    | WP_019563934.1 | WP_081621424.1 | WP_026330565.1 | Gamma |
| <i>Thioalkalivibrio</i> sp. ALMg9    | WP_018169554.1 | WP_081620143.1 | WP_026305952.1 | Gamma |
| <i>Thioalkalivibrio</i> sp. K90mix   | WP_012982927.1 | WP_012982924.1 | WP_012982951.1 | Gamma |
| <i>Thioalkalivibrio versutus</i>     | WP_047250985.1 | WP_047250991.1 | WP_047251909.1 | Gamma |
| <i>Thiothrix lacustris</i>           | OQX06987.1     | OQX08772.1     | OQX02620.1     | Gamma |
| <i>Vibrio alginolyticus</i>          | WP_086050204.1 | WP_065646566.1 | WP_065646570.1 | Gamma |
| <i>Vibrio anguillarum</i>            | AQP34955.1     | WP_019282752.1 | AQP34953.1     | Gamma |
| <i>Vibrio cholerae</i>               | WP_000433077.1 | ADF80985.1     | WP_076025069.1 | Gamma |
| <i>Vibrio crassostreae</i>           | WP_048661363.1 | WP_048663200.1 | WP_048663203.1 | Gamma |
| <i>Vibrio cyclitrophicus</i>         | WP_016791019.1 | WP_016797283.1 | WP_016797280.1 | Gamma |
| <i>Vibrio genomosp. F10</i>          | WP_017040691.1 | WP_065576635.1 | WP_065576634.1 | Gamma |
| <i>Vibrio harveyi</i> CAIM1075       | WP_050914487.1 | WP_050937014.1 | WP_050914489.1 | Gamma |
| <i>Vibrio metoecus</i>               | WP_055052054.1 | WP_055044314.1 | WP_055052055.1 | Gamma |
| <i>Vibrio mimicus</i>                | WP_000433076.1 | WP_070382450.1 | WP_000494954.1 | Gamma |
| <i>Vibrio nigripulchritudo</i>       | WP_022552005.1 | WP_022552020.1 | WP_022552006.1 | Gamma |
| <i>Vibrio parahaemolyticus</i>       | WP_020904316.1 | WP_020904315.1 | WP_020904314.1 | Gamma |
| <i>Vibrio splendidus</i>             | WP_017087969.1 | WP_017085935.1 | WP_017085937.1 | Gamma |
| <i>Vibrio tasmaniensis</i>           | WP_065106141.1 | WP_041472952.1 | WP_065113257.1 | Gamma |
| <i>Vibrio vulnificus</i>             | WP_013572513.1 | WP_013572512.1 | WP_013572511.1 | Gamma |
| <i>Mariprofundus ferrooxydans</i>    | WP_018294067.1 | WP_026195384.1 | WP_018294071.1 | Zeta  |

|                                              |                |                |                |      |
|----------------------------------------------|----------------|----------------|----------------|------|
| Zetaproteobacteria bacterium<br>CG2_30_46_52 | OIP99107.1     | OIP99141.1     | OIQ00419.1     | Zeta |
| Zetaproteobacteria bacterium TAG-1           | WP_038246546.1 | WP_038246540.1 | WP_038249350.1 | Zeta |

**Table S2. Bacterial strains containing homologs of *R. etli* CE3 WreQ, WreV and *P. aeruginosa* O6 WbpL.**

WreQ (YP\_470339.1), WbpL (AAF23990.1) and WreV (YP\_471773.1) were used individually as query sequences in BLAST searches against the non-redundant protein sequence (nr) database using the blastp algorithm. WreQ and WreV searches were performed following the same strategy as in Table S1. The WbpL BLAST search was performed by excluding Pseudomonadaceae and the maximum target sequences were set at 1000. The resulting matches to WbpL all have E-values less than  $7e-32$ . Strains containing homologs to the three genes are listed below, along with the accession numbers of the protein homologs and the phylogenetic affiliations of the strains. Where strain numbers are absent, they can be found by investigating the gene accessions.

| Strain                           | WreQ accession | WbpL accession | WreV accession | Phylo |
|----------------------------------|----------------|----------------|----------------|-------|
| Alphaproteobacteria bacterium    | OFW83437.1     | OFW83436.1     | OFW84297.1     | Alpha |
| Azospirillum humicireducens      | WP_063635086.1 | WP_063635083.1 | WP_063635087.1 | Alpha |
| Azospirillum lipoferum           | WP_014248476.1 | WP_012974782.1 | WP_085556015.1 | Alpha |
| Azospirillum oryzae              | WP_085089998.1 | WP_085089995.1 | WP_085089999.1 | Alpha |
| Azospirillum sp. B506            | WP_042696170.1 | WP_042696173.1 | WP_042696169.1 | Alpha |
| Azospirillum thiophilum          | WP_045580795.1 | WP_045580792.1 | WP_045580796.1 | Alpha |
| Devosia chinhatensis             | WP_046103598.1 | WP_046103597.1 | WP_046103596.1 | Alpha |
| Devosia chinhatensis             | WP_046103598.1 | WP_046103597.1 | WP_046103596.1 | Alpha |
| Devosia sp. 67-54                | OJX19969.1     | OJX19967.1     | OJX19968.1     | Alpha |
| Devosia sp. Root105              | WP_082528546.1 | WP_055884710.1 | WP_055872943.1 | Alpha |
| Haematospirillum jordaniae       | WP_066132823.1 | AMW34221.1     | WP_066133023.1 | Alpha |
| Magnetospirillum gryphiswaldense | WP_041634754.1 | WP_041634753.1 | WP_052589129.1 | Alpha |
| Magnetospirillum gryphiswaldense | CDL00675.1     | CDL00674.1     | CDL00757.1     | Alpha |
| Magnetospirillum sp. XM-1        | WP_068430147.1 | CUW37957.1     | WP_068430462.1 | Alpha |
| Mesorhizobium sp. YR577          | WP_091914561.1 | WP_091914110.1 | WP_091914112.1 | Alpha |
| Mesorhizobium sp. YR577          | WP_091914561.1 | WP_091914110.1 | WP_091914112.1 | Alpha |
| Rhizobium sp. Root149            | WP_062557229.1 | WP_062557228.1 | WP_062557230.1 | Alpha |
| Rhodocista sp. MIMtkB3           | WP_075773469.1 | WP_075772476.1 | WP_075769167.1 | Alpha |
| Rhodospirillaceae bacterium      | OUX31398.1     | OUX31399.1     | OUX31397.1     | Alpha |
| Rhodospirillales bacterium       | OHC75555.1     | OHC75553.1     | OHC75556.1     | Alpha |
| Terasakiella sp. PR1             | WP_069186887.1 | WP_069186886.1 | WP_069186888.1 | Alpha |
| Thalassospira alkalitolerans     | WP_085616563.1 | WP_085615659.1 | WP_085614765.1 | Alpha |
| Thalassospira mesophila          | WP_085582449.1 | WP_085578919.1 | WP_085578921.1 | Alpha |
| Thalassospira profundimaris      | WP_064788430.1 | WP_008888595.1 | WP_008888594.1 | Alpha |
| Thalassospira sp. MCCC           | WP_085588244.1 | WP_085590024.1 | WP_085590155.1 | Alpha |
| Thalassospira sp. Nap_22         | KXJ56428.1     | KXJ54524.1     | KXJ54525.1     | Alpha |
| Thalassospira sp. TSL5-1         | WP_073955943.1 | WP_073956208.1 | WP_073955272.1 | Alpha |
| Thalassospira xiamenensis        | WP_062958433.1 | WP_062960508.1 | WP_062960509.1 | Alpha |



|                                       |                |                |                |       |
|---------------------------------------|----------------|----------------|----------------|-------|
| <i>Azoarcus toluclasticus</i>         | WP_040394211.1 | WP_051092234.1 | WP_018988035.1 | Beta  |
| <i>Lautropia</i> sp. SCN 70-15        | ODT33269.1     | ODT33266.1     | ODT33268.1     | Beta  |
| <i>Methylibium</i> sp. NZG            | KNZ31778.1     | KNZ31777.1     | KNZ31776.1     | Beta  |
| <i>Aeromonas veronii</i>              | WP_005350303.1 | WP_005338066.1 | WP_005338065.1 | Gamma |
| <i>Aquisalimonas asiatica</i>         | SEO80355.1     | SEO80337.1     | SEO80272.1     | Gamma |
| <i>C. Tenderia electrophaga</i>       | ALP53219.1     | ALP54791.1     | ALP53220.1     | Gamma |
| <i>C. Thiodiazotropha endoloripes</i> | WP_068994608.1 | WP_068994607.1 | WP_068994639.1 | Gamma |
| <i>Cellvibrio</i> sp. PSBB006         | WP_087465803.1 | WP_087465802.1 | WP_087465797.1 | Gamma |
| <i>Crenothrix</i> sp. D3              | OTE95239.1     | OTE95238.1     | OTE95237.1     | Gamma |
| <i>Ectothiorhodospira marina</i>      | WP_090255654.1 | WP_090255652.1 | WP_090250421.1 | Gamma |
| <i>gamma proteobacterium IMCC2047</i> | EGG98104.1     | EGG99498.1     | EGH00084.1     | Gamma |
| <i>Halomonas utahensis</i>            | WP_077530405.1 | WP_077530383.1 | WP_077530382.1 | Gamma |
| <i>Immundisolibacter cernigliae</i>   | WP_068803522.1 | WP_068803523.1 | WP_083214804.1 | Gamma |
| <i>Legionella geestiana</i>           | WP_028385720.1 | WP_051550994.1 | WP_051550925.1 | Gamma |
| <i>Legionella israelensis</i>         | WP_058500563.1 | WP_058500543.1 | WP_058500737.1 | Gamma |
| <i>Marinobacter mobilis</i>           | WP_091817059.1 | WP_091817062.1 | WP_091817065.1 | Gamma |
| <i>Methylobacter tundripaludum</i>    | WP_006890946.1 | WP_006890945.1 | WP_006890944.1 | Gamma |
| <i>Methylomicrobium</i>               | WP_005371725.1 | WP_005371723.1 | WP_005371722.1 | Gamma |
| <i>Methylomicrobium alcaliphilum</i>  | WP_014146586.1 | WP_046061293.1 | WP_046060910.1 | Gamma |
| <i>Methylomicrobium buryatense</i>    | WP_017841410.1 | WP_040575735.1 | WP_017841407.1 | Gamma |
| <i>Methylosarcina fibrata</i>         | WP_020562151.1 | WP_020562152.1 | WP_020562153.1 | Gamma |
| <i>Methylosarcina lacus</i>           | WP_029646324.1 | WP_024296937.1 | WP_024296936.1 | Gamma |
| <i>Methylovulum miyakonense</i>       | WP_019868468.1 | WP_019868467.1 | WP_019868466.1 | Gamma |
| <i>Methylovulum psychrotolerans</i>   | WP_088618707.1 | WP_088618706.1 | WP_088618705.1 | Gamma |
| <i>Microbulbifer variabilis</i>       | WP_020411331.1 | WP_026304876.1 | WP_020411328.1 | Gamma |
| <i>Motiliproteus</i> sp. MSK22-1      | WP_076720080.1 | WP_076720081.1 | WP_076720083.1 | Gamma |
| <i>Rheinheimera</i> sp. SA_1          | WP_082971652.1 | WP_068063778.1 | WP_082971650.1 | Gamma |
| <i>Stenotrophomonas rhizophila</i>    | WP_061203702.1 | KWW13329.1     | WP_061203704.1 | Gamma |
| <i>Thioalkalivibrio</i> sp. AKL11     | WP_083916429.1 | WP_026288304.1 | WP_018941009.1 | Gamma |
| <i>Thioalkalivibrio</i> sp. AKL17     | WP_026289054.1 | WP_018947748.1 | WP_018945921.1 | Gamma |
| <i>Thioalkalivibrio</i> sp. ALJ15     | WP_083925125.1 | WP_020146293.1 | WP_020146532.1 | Gamma |
| <i>Thioalkalivibrio</i> sp. ALJ2      | WP_081616998.1 | WP_018994651.1 | WP_018994650.1 | Gamma |
| <i>Thioalkalivibrio</i> sp. ALR17-21  | WP_024329946.1 | WP_024329948.1 | WP_024328922.1 | Gamma |
| <i>Thiohalomonas denitrificans</i>    | WP_092998985.1 | WP_092999077.1 | WP_092992255.1 | Gamma |
| <i>Deltaproteobacteria bacterium</i>  | OGQ52421.1     | OGQ54831.1     | OGQ57681.1     | Delta |

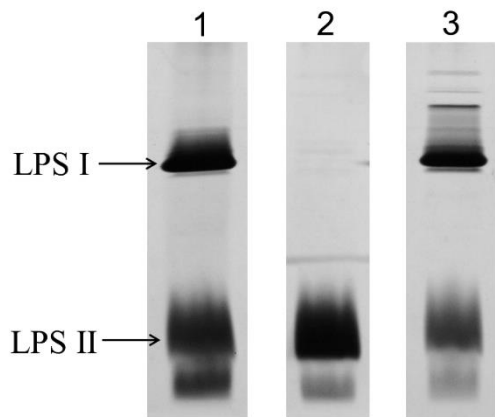

**Fig. S1.** Complementation of the *R. etli wreU::Km* mutant strain CE566 with *His<sub>6</sub>-wreU*. Silver-stained SDS-PAGE (18% gel) of LPS samples from whole-cell lysates. Lanes: lane 1, CE3 (wild-type); lane 2, CE566 (*wreU::Km*); lane 3, CE566/pLS22 (*wreU::Km/His<sub>6</sub>-wreU*). LPS I carries O antigen, whereas LPS II does not [1, 2].

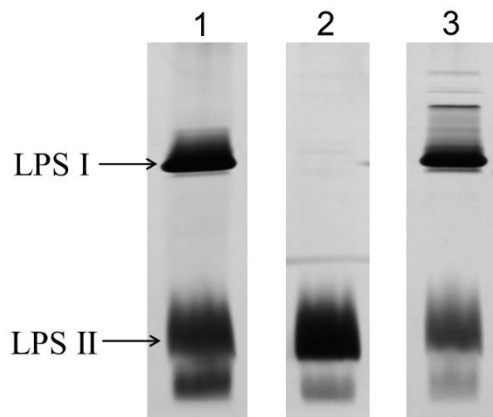

**Fig. S2.** Complementation of the *R. etli wreG::Tn5* mutant strain CE358 with *wreG-His<sub>6</sub>*. Silver-stained SDS-PAGE (18% gel) of LPS samples from whole-cell lysates. Lanes: lane 1, CE3 (wild-type); lane 2, CE358 (*wreG::Tn5*); lane 3, CE358/pTL63 (*wreG::Tn5/wreG-His<sub>6</sub>*).

(a) WreU (188 aa)

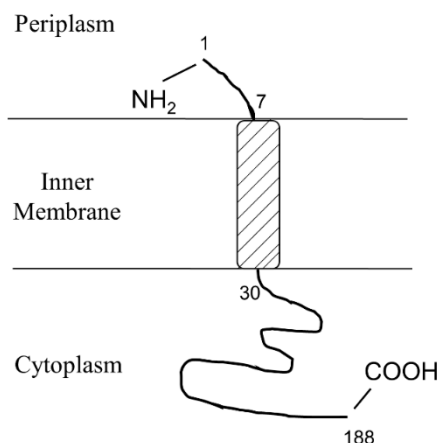

(b)

|      |                                                        |     |
|------|--------------------------------------------------------|-----|
| WreU | ---MGLKRAVDFLLALIASVILLVPIILVVALSVRLTSPGPILYWSKRIGR    | 47  |
| WbaP | RSSRFLKRTFDIVCSIMILIIASPLMIYLWYKV-TRDGGPAIYGHQRVGR     | 322 |
| PglC | MYEKVEKRI FDFILALVLLVLFSPVILITALLIKI-TQGSVIFTQNR PGL   | 49  |
| WecP | PIYAFIKRGM DILAAVIAIPLFSPMLLATAVLIKLESPGPVMFLQNRV GK   | 278 |
| WreU | FNQIFLMPKFRSMRVDTPTVATHLL-----ENPERFETPI               | 82  |
| WbaP | HGKLFPCYKFRSMVMNSQEV LKELLANDPIARAWEKDFKLKNDPRITAV     | 372 |
| PglC | DEKIFK IYKFKTMSDERDEKG-----ELLS--DELRLKAF              | 82  |
| WecP | GNRDFRIYKFRSMCQNSEQHG-----AQFAQDGD MRVTRV              | 313 |
| WreU | GSFLRKSSLDEL PQLWCILAGKMSFV GPRPALYNQYDLIELRTVY--GVD   | 130 |
| WbaP | GRFIRKTSLDEL PQLFNVLKGDMSLVGPRPIVSDELERYCDDVDY YL---   | 419 |
| PglC | GKIVRSLSLDEL LQLFNVLKGDMSFV GPRPLLVEYLP LYNKEQ---KLRH  | 129 |
| WecP | GKVI RKLRIDEL PQLFFNVLKGDMSLIGPRPEQRTFVDQFDREIPF YMYRH | 363 |
| WreU | KLLPGLTGWAQINGRDE---LPIPEKVKVFDVEYLER RSLGFDMRILFLTA   | 177 |
| WbaP | MAKPGMTGLWQVSGRND---VDYDTRVYFDSWYVKNWTLWNDIAILFKTA     | 466 |
| PglC | KVRPGITGWAQVNGRNA---ISWQKKFELDVYYVKNISFLLDLKIMFLTA     | 176 |
| WecP | IVRPGISGWAQVVHGYAADADDTRI KIEHDFYIKNFSLWLDVLI VERTI    | 413 |
| WreU | EKV VRRKGIKH-----                                      | 188 |
| WbaP | KVVLRRDGAY-----                                        | 476 |
| PglC | LKVLKRS GVSKEGHVTTEKFNGKN                              | 200 |
| WecP | RTILTGF GAR-----                                       | 423 |

**Fig. S3.** (a) Topological model for *R. etli* CE3 WreU. The shaded rectangle boxes represent transmembrane (TM) segments. The numbers indicate the amino acid positions of the boundary of each TM domain. (b) Multiple sequence alignment of the *R. etli* CE3 WreU (YP\_471772) with *C. jejuni* PglC (YP\_002344517), the C-terminal domain (274-476 aa) of *S. enterica* WbaP (NP\_461027) and the C-terminal domain (229-423) of *A. hydrophila* WecP (EU274663), by use of the Clustal Omega program [3] (available on the World Wide Web at [www.ebi.ac.uk/Tools/msa/clustalo/](http://www.ebi.ac.uk/Tools/msa/clustalo/)). Identical amino acids are highlighted in black and similar amino acids are highlighted in grey.

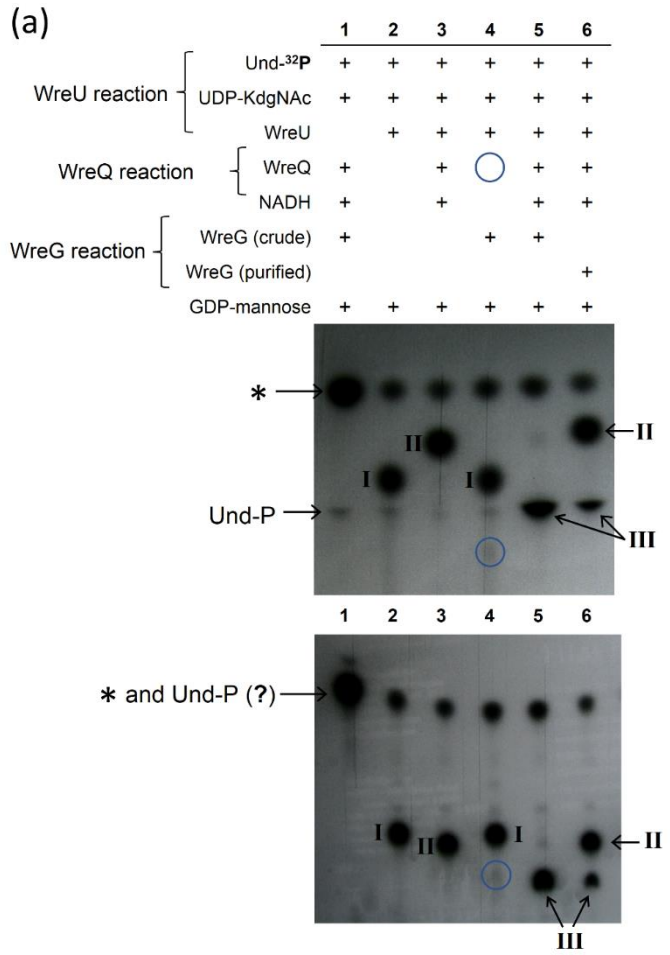

[<sup>32</sup>P] WreU-WreQ-WreG coupled enzyme assay

○ Und-PP-KdgNAc-Man?

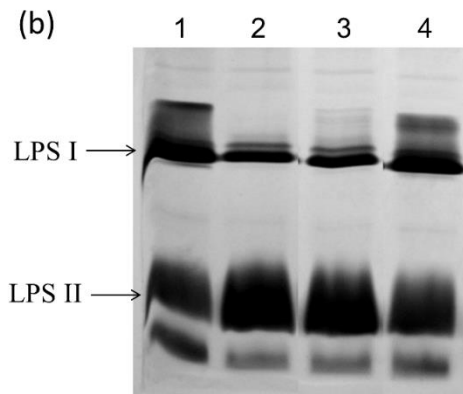

**Fig. S4.** (a) Highlight of the possible Und-PP-KdgNAc-Man product present in Fig. 5. (b) Suppression of *R. etli wreQ::Tn5* mutant strain CE166 by introducing multiple copies of *wreU* or *wreG* gene. Lanes: lane 1, CE3 (*R. etli* wild-type strain); lane 2, CE166 (*wreQ::Tn5*); lane 3, CE166/pLS22, strain CE166 harboring pLS22 plasmids expressing His<sub>6</sub>-WreU; lane 4, CE166/pTL63, strain CE166 harboring pTL63 plasmids expressing WreG-His<sub>6</sub>. Note that extra copies of *wreG* suppressed the deficiency in O-antigen amount (lane 4), whereas extra copies of *wreU* did not (lane 3). Hypothesis 1 of Fig. 1(c) would have predicted suppression by multiple copies of *wreU*. A probable explanation of the suppression is that higher concentrations of WreG compensate for its weaker catalysis when KdgNAc is the acceptor residue in the reaction instead of the preferred QuiNAc residue.

### *Rhizobium etli* CE3

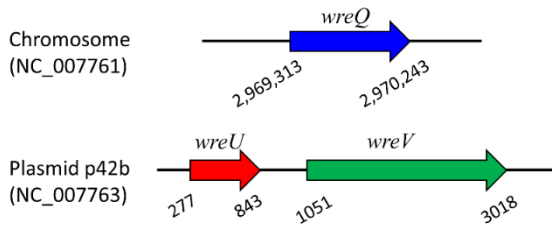

### *Colwellia psychrerythraea* 34H

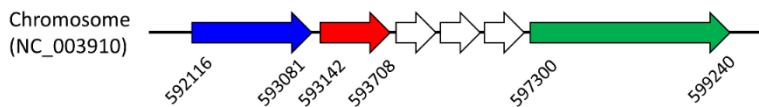

**Fig. S5.** The genomic locations of *Rhizobium etli* strain CE3 *wreV*, *wreU*, *wreQ* genes and their orthologs in *Colwellia psychrerythraea* strain 34H. *wreV*, *wreU*, *wreQ* and their orthologs are shown in green, red, blue respectively. Protein accession numbers: *R. etli* CE3 WreV (YP\_471773), WreU (YP\_471772), WreQ (YP\_470339); *C. psychrerythraea* 34H WreV ortholog (WP\_011041444), WreU ortholog (WP\_011041440), WreQ ortholog (WP\_011041439).

## REFERENCES

1. **Carlson RW, Kalembasa S, Turowski D, Pachori P, Noel KD.** Characterization of the lipopolysaccharide from a *Rhizobium phaseoli* mutant that is defective in infection thread development. *J Bacteriol* 1987;169(11):4923-4928.
2. **Noel KD, Forsberg LS, Carlson RW.** Varying the abundance of O antigen in *Rhizobium etli* and its effect on symbiosis with *Phaseolus vulgaris*. *J Bacteriol* 2000;182(19):5317-5324.
3. **Sievers F, Wilm A, Dineen D, Gibson TJ, Karplus K et al.** Fast, scalable generation of high-quality protein multiple sequence alignments using Clustal Omega. *Mol Syst Biol* 2011;7:539.
